# Supplementary material for: IL-36 activates neutrophil extracellular traps and exacerbates LPS-induced ARDS in mice
Source: Sci Rep. 2026 May 9;16:21231. doi: 10.1038/s41598-026-51329-w (PMC13347007; doi:10.1038/s41598-026-51329-w)
Supplement: Supplementary file 20 — Supplementary Information 20. [file 41598_2026_51329_MOESM20_ESM.xlsx]

## Sheet: Sheet1
The dry-wet ratio of mice lungs
	Control	ARDS	ARDS+ IL-36	ARDS+ IL-36Ra
	2.21	3.09	4.74	2.47
	2.22	2.92	4.18	2.85
	1.6	2.94	4.23	2.49
	2.1	3.12	4.55	2.53
	1.88	3.5	4.11	2.57
Average	2.002	3.114	4.362	2.582
SD	0.235321	0.208576	0.241777	0.138333
IL-10 in BALF							IL-10 in serum
	Control	ARDS	ARDS+IL-36	ARDS+IL-36Ra			Control	ARDS	ARDS+IL-36	ARDS+IL-36Ra
	50.46	91.92	186.46	72.65			16.68	140.83	390.08	61.77
	36.65	94.18	125.48	67.91			21.21	125.92	352.53	86.3
	34.29	93.1	135.52	70.07			26.11	153.09	346.68	88.75
	53.94	87.14	165.28	70.05			20.08	165.74	372.53	73.28
	38.54	103.12	158.93	65.93			15.17	112.15	330.08	82.34
Average	42.776	93.892	154.334	69.322		Average	19.85	139.546	358.38	78.488
SD	7.88876	5.20278	21.7234	2.26559		SD	3.82208	19.0127	20.8668	9.87713
MPO in BALF							MPO in serum
	Control	ARDS	ARDS+IL-36	ARDS+IL-36Ra			Control	ARDS	ARDS+IL-36	ARDS+IL-36Ra
	2.8	18.4	20.73	16.54			24.19	77.1	82.26	55.48
	3.19	17.27	20.27	16.74			26.45	77.74	85.48	63.55
	5.18	18.21	21.56	15.44			18.06	83.55	86.13	62.26
	5.61	17.53	20.9	15.95			20.32	77.74	95.81	63.55
	3.37	18.89	23.11	17.36			26.13	72.26	83.55	60.32
Average	4.03	18.06	21.314	16.406		Average	23.03	77.678	86.646	61.032
SD	1.1378	0.588558	0.988789	0.660412		SD	3.30748	3.58265	4.78387	3.01729
TNF-αin BALF							TNF-αin serum
	Control	ARDS	ARDS+IL-36	ARDS+IL-36Ra			Control	ARDS	ARDS+IL-36	ARDS+IL-36Ra
	119.08	239.36	417.52	155.06			299.43	742.29	1308	529.43
	95.76	216.65	300.2	167.89			259.43	716.57	1235.14	413.71
	78.87	222.86	339.11	190.1			342.29	836.57	1122.29	383.71
	119.64	240.89	399.24	148.15			408	945.14	1213.71	473.71
	113.85	234.73	374.58	151.45			250.86	748	1308	503.71
Average	105.44	230.898	366.13	162.53		Average	312.002	797.714	1237.43	460.854
SD	15.8624	9.52622	42.1556	15.3244		SD	57.9538	84.1093	68.9715	54.5497
	WB CitH3/GAPDH
	Control	ARDS	ARDS+IL-36	ARDS+IL-36Ra
	0.997737	10.2724	11.0129	9.09039
	0.857669	10.0992	11.7132	9.57557
	1.14459	10.4154	11.3698	9.87165
Average	1	10.2623	11.3653	9.51254
SD	0.117147	0.129282	0.285918	0.322047
	WB NE/GAPDH
	Control	ARDS	ARDS+IL-36	ARDS+IL-36Ra
	0.84514	6.12668	6.43836	5.35344
	1.19622	6.13118	6.59303	5.5822
	0.958642	6.13969	6.76057	5.71327
Average	1	6.13252	6.59732	5.54964
SD	0.14628	0.00539625	0.131577	0.148695
		CCK8
	Control	NETs	NETs+IL-36	NETs+IL-36Ra
	96.1741	93.3661	60.5125	71.1829
	101.228	87.8905	55.5985	71.6041
	105.3	89.8561	57.5641	81.1513
	97.2973	86.7673	60.2317	63.7417
Average	100	89.47	58.4767	71.92
SD	3.58965	2.5064	2.02122	6.1795
	The inflammatory cytokine IL-10 was detected by ELISA on the cell supernatant
	Control			PMA			PMA + cathepsin G			PMA + elastase
IL-36α	65.77	53.43	71.94	177.89	186.83	161.3	100.45	119.38	105.98	143	138.96	128.53
IL-36β	53.12	36	52.54	124.27	128.88	110.81	74.65	79.85	67.92	111.77	95.23	94.46
IL-36γ	43.92	36.32	38.32	104.32	81.92	95.12	55.72	61.52	48.92	77.52	74.72	78.32
Average
SD
	The inflammatory cytokine TNF-αwas detected by ELISA on the cell supernatant
	Control			PMA			PMA + cathepsin G			PMA + elastase
IL-36α	131.78	177.19	155.3	391.24	346.92	358	209.62	240.16	174.49	269.62	288.27	266.92
IL-36β	125.71	147.65	132.81	302.48	267	290.87	187.65	190.23	167.97	264.42	221.84	229.58
IL-36γ	67.39	75.58	59.82	213.76	236.48	208.61	122.85	118.91	91.33	201.94	156.18	148.61
ELISA was used to detect the inflammatory cytokine IL-10 in the cell supernatant
	Control	NETs	NETs+IL-36	NETs+IL-36Ra
	21.37	58.92	132.18	85.24
	32.59	45.24	116.06	94.02
	25.65	55.04	122.39	90.96
Average	26.5367	53.0667	123.543	90.0733
SD	4.62326	5.75651	6.6313	3.63884
ELISA was used to detect the inflammatory cytokine TNF-αin the cell supernatant
	Control	NETs	NETs+IL-36	NETs+IL-36Ra
	114.29	133.41	262.82	206.94
	91.65	170.18	257.24	226.06
	96.94	149.88	297.82	191.65
Average	100.96	151.157	272.627	208.217
SD	9.66998	15.0384	17.9594	14.0768
WB p-p65 NF-κB/p65 NF-κB
Control	NETs	NETs+IL-36	NETs+IL-36Ra
1.05402	6.19292	11.3129	7.67418
0.946201	5.64434	10.9123	6.98896
1.00108	6.37038	12.1449	8.73208
Cell immunofluorescence count
Control			PMA
0.45	0.73	0.78	2.58	4.05	2.76
12.11	15.25	16.51	17.45	16.99	19.21

## Sheet: Sheet2
	细胞免疫荧光计数
	Control			PMA
	0.45	0.73	0.78	2.58	4.05	2.76
	12.11	15.25	16.51
	0.45			2.58
	0.73			4.05
	0.78			2.76
平均值	0.653333			3.13		4.79082
方差	0.14522			0.654675
	12.11			17.45
	15.25			16.99
	16.51			19.21
	14.6233			17.8833		1.22293
	1.85014			0.956707
